# Supplementary material
Source: PubMed Central journal article supplement (PMC4688176)
Supplement: NIHMS718083-supplement-01.pdf [file NIHMS718083-supplement-01.pdf]

# Online Appendix

## A1 Attrition

This section discusses attrition in more detail and examines whether attrition may bias our results. MLSFH interviewers do not pursue respondents who are absent from the village, which leads to a 10 percent loss to follow-up between adjacent survey rounds. Surveyors replenish the sample in order to maintain the sample size (Kohler et al. 2014). In addition to death and permanent emigration, temporary migration contributes substantially to loss to follow-up. 44 percent of respondents who are absent in 2008 (but present in 2006) reappear in 2010.

Attrition may confound our estimates if it is correlated with ART proximity and the outcome variables. For instance, attrition by people near ART with poor mental health or low work time may spuriously suggest that ART availability increases these outcomes. We analyze attrition for respondents who are present in 2006, the final pre-ART survey round. We distinguish between three types of respondents: non-attriters are present in 2006, 2008, and 2010; “temporary migrants” are present in 2006 and 2010, but not 2008; attriters are present in 2006 but are absent in 2010. By this definition, people who leave temporarily in 2010 are categorized as attriters.

In practice, attrition is unlikely to pose a problem because it is uncorrelated with ART proximity. Figure A3 shows the non-parametric relationship between the three attrition categories and the distance to ART. The ART distance gradient is generally flat, which indicates that attrition does not vary systematically with the distance to ART. Analogous linear regressions (available from the authors) also show small and insignificant effects. The figure also addresses the concern that respondents may move in order to live closer to an ART facility. Anyone who relocates (for ART or another reason) is classified as an attriter. Systematic relocation toward ART would lead to an upward sloping attrition gradient, which is not evident in the figure.

1  
2  
3  
4 Table A2 examines how baseline characteristics vary with attrition status. Mental health  
5 is similar across all groups but work time is significantly lower for attriters and temporary  
6 migrants. In principle, this difference could confound our estimates if attriters differentially  
7 live near ART. In addition to the lack of such a correlation, the work time difference between  
8 attriters and non-attriters is too small to explain our estimates. As a bounding exercise, we  
9 reproduce our work time regressions after assigning attriters the maximum value of ART  
10 proximity (0.99). After this modification, the effect on work time is 24 percent smaller but  
11 remains statistically significant. Other differences by attrition status are consistent with  
12 death and permanent emigration as causes of attrition: attriters are younger, wealthier,  
13 more often married, and more likely to have HIV.  
14

15  
16 As another test of whether results are sensitive to attrition, we reproduce our main  
17 results for only non-attriters in Table A3. Respondents in these regressions are present in  
18 all survey rounds, which eliminates selection as a possible confound. Estimates are strongly  
19 significant and closely resemble the results in the paper. As before, results are not sensitive  
20 to including the interaction of Post and demographic and economic controls.  
21  
22

## 23 24 25 26 27 28 29 30 31 32 33 34 35 36 37 38 **A2 Estimates for HIV-Positive Respondents and Caretakers** 39 40

41 This section reports results for HIV-positive and caretaker respondents. The analysis in the  
42 paper excludes these respondents in order to isolate the role of HIV *risk*. Existing economic  
43 and public health studies document the direct effect of ART on the mental health and labor  
44 supply of HIV-positive recipients and caretakers (Els et al. 1999, McLaren 2010, Tostes et  
45 al. 2004, Thirumurthy et al. 2008, Thom 2009, Kuo et al. 2012, Thirumurthy et al. 2012,  
46 Okeke and Wagner 2013). Small samples of HIV-positive and caretaker respondents limit  
47 the power to detect effects for these groups. The sample includes 99 people who are ever  
48 HIV-positive and 425 people who ever qualify as caretakers.  
49  
50

51  
52 Table A4 reproduces our main estimates for HIV positive and and caretaker respondents.  
53 Estimates for HIV-positive respondents in Panel A are extremely imprecise. Standard errors  
54  
55  
56  
57

1  
2  
3  
4 are over four times larger in the HIV-positive subsample than in the HIV-negative subsample.  
5  
6 The effect on mental health has a 95 percent confidence interval of -21.0 to 20.3, compared  
7  
8 to an interval of 3.7 to 13.2 for HIV-/NCTs. Estimates for caretakers in Panel B resemble  
9  
10 the HIV-/NCT results in the paper. The effects on mental health and subjective mortality  
11  
12 risk are slightly larger than results in the paper and are statistically significant, while the  
13  
14 effect on work time is smaller and is not significant. Other estimates for these subsamples  
15  
16 are available from the authors.  
17  
18  
19  
20

### 21 **A3 Policy Targeting and Mean Reversion**

22  
23

24 Mean reversion may confound our estimates if ART proximity is correlated with unobserv-  
25  
26 able shocks in the outcome variables. Under this mechanism, outcomes improve near ART  
27  
28 because of random variation rather than a causal effect. ART proximity could be correlated  
29  
30 with unobservable shocks if policymakers targeted ART toward places with low labor supply  
31  
32 or poor mental health, either directly or through other variables like HIV prevalence. As  
33  
34 we discuss above, the MoH adopted an explicit policy to maximize geographic coverage.  
35  
36 The resulting coverage pattern, in which ART demand is negatively correlated with supply,  
37  
38 suggests that officials adhered to this policy.  
39  
40

41 We address this concern further by controlling for the interaction between the initial  
42  
43 level of the dependent variable and 2008 and 2010 dummies. This approach addresses the  
44  
45 possibility mean reversion because unobservable trends are correlated with the baseline level  
46  
47 of the dependent variable under this mechanism.<sup>24</sup> Panel A of Table A5 shows estimates for  
48  
49 our main outcomes under this approach. All estimates are attenuated but effects on work  
50  
51 time and mental health remain significant. The effect on subjective mortality risk is also  
52  
53 marginally significant with a p-value of around 0.15. Estimates for HIV-negative and non-  
54  
55 caretaker subsamples are similar and are available from the authors. These results suggest  
56  
57

---

58 <sup>24</sup>For work time, which has two pre-intervention rounds, we interact with both the 2004 and 2006 levels  
59 of the dependent variable.  
60  
61  
62  
63  
64  
65

1  
2  
3  
4 that mean reversion does not explain our findings.  
5  
6  
7

## 8 **A4 Other Distance Parameterizations** 9

10  
11 This section provides estimates using alternative distance parameterizations. As we explain  
12 in the text, proximity (inverse distance) captures the non-linear relationship between distance  
13 and access in a parsimonious way. Table A6 shows estimates based on first, second, and  
14 third order polynomials of ART distance for our main outcome variables. Linear distance  
15 regressions appear in Columns 1, 4, and 7. Column 1 shows that an an additional kilometer  
16 decreases work time by 0.05 hours (3.2 minutes), an insignificant result. This approach  
17 places equal weight on respondents at all distances, including 62 percent of the sample who  
18 are farther than 8 kilometers from an ART facility and show no effect in Figure 4. Linear  
19 distance estimates for subjective mortality risk and mental health in Columns 4 and 7 are  
20 also less significant than their counterparts in the paper. The addition of quadratic and cubic  
21 polynomial terms substantially improves the precision of the estimates, which confirms that  
22 the relationship between distance and outcomes is non-linear. Higher-order polynomial terms  
23 are not significant in these regressions.  
24  
25  
26  
27  
28  
29  
30  
31  
32  
33  
34  
35  
36  
37  
38

39 Table A7 shows estimates under two additional parameterization. Panel A uses a piece-  
40 wise linear spline in which we interact ART distance with dummies for distances above and  
41 below 8 kilometers. Year interactions with  $[D \leq 8] \cdot \text{ART distance}$  provide the linear distance  
42 impacts for people within 8 kilometers of an ART facility. In Column 1, an additional kilo-  
43 meter reduces work time by 0.46 hours within 8 kilometers, while an additional kilometer  
44 has no effect on work time beyond 8 kilometers. The unrealistically large work time esti-  
45 mate within 8 kilometers suggests that the specification remains a poor fit. Estimates for  
46 mortality risk and mental health are similarly large and significant within 8 kilometers and  
47 small and insignificant beyond 8 kilometers.  
48  
49  
50  
51  
52  
53  
54  
55  
56  
57

58 Panel B of Table A7 shows estimates using discrete distance bins for less than 4 kilome-  
59 ters, 4 – 8 kilometers, and more than 8 kilometers. People within 4 kilometers of ART work  
60  
61  
62

1  
2  
3  
4  
5  
6  
7  
8  
9  
10  
11  
12  
13  
14  
15  
16  
17  
18  
19  
20  
21  
22  
23  
24  
25  
26  
27  
28  
29  
30  
31  
32  
33  
34  
35  
36  
37  
38  
39  
40  
41  
42  
43  
44  
45  
46  
47  
48  
49  
50  
51  
52  
53  
54  
55  
56  
57  
58  
59  
60  
61  
62  
63  
64  
65

1.1 hours more than those beyond 8 kilometers ( $p = 0.105$ ). They perceive a 7.4 percent lower probability of death within five years and they have MCS-12 scores that are 3.12 points higher in 2010. These estimates discard intra-bin variation in distance and are less precise than the ART proximity estimates in the paper.

1  
2  
3  
4  
5  
6  
7  
8  
9  
10  
11  
12  
13  
14  
15  
16  
17  
18  
19  
20  
21  
22  
23  
24  
25  
26  
27  
28  
29  
30  
31  
32  
33  
34  
35  
36  
37  
38  
39  
40  
41  
42  
43  
44  
45  
46  
47  
48  
49

A6

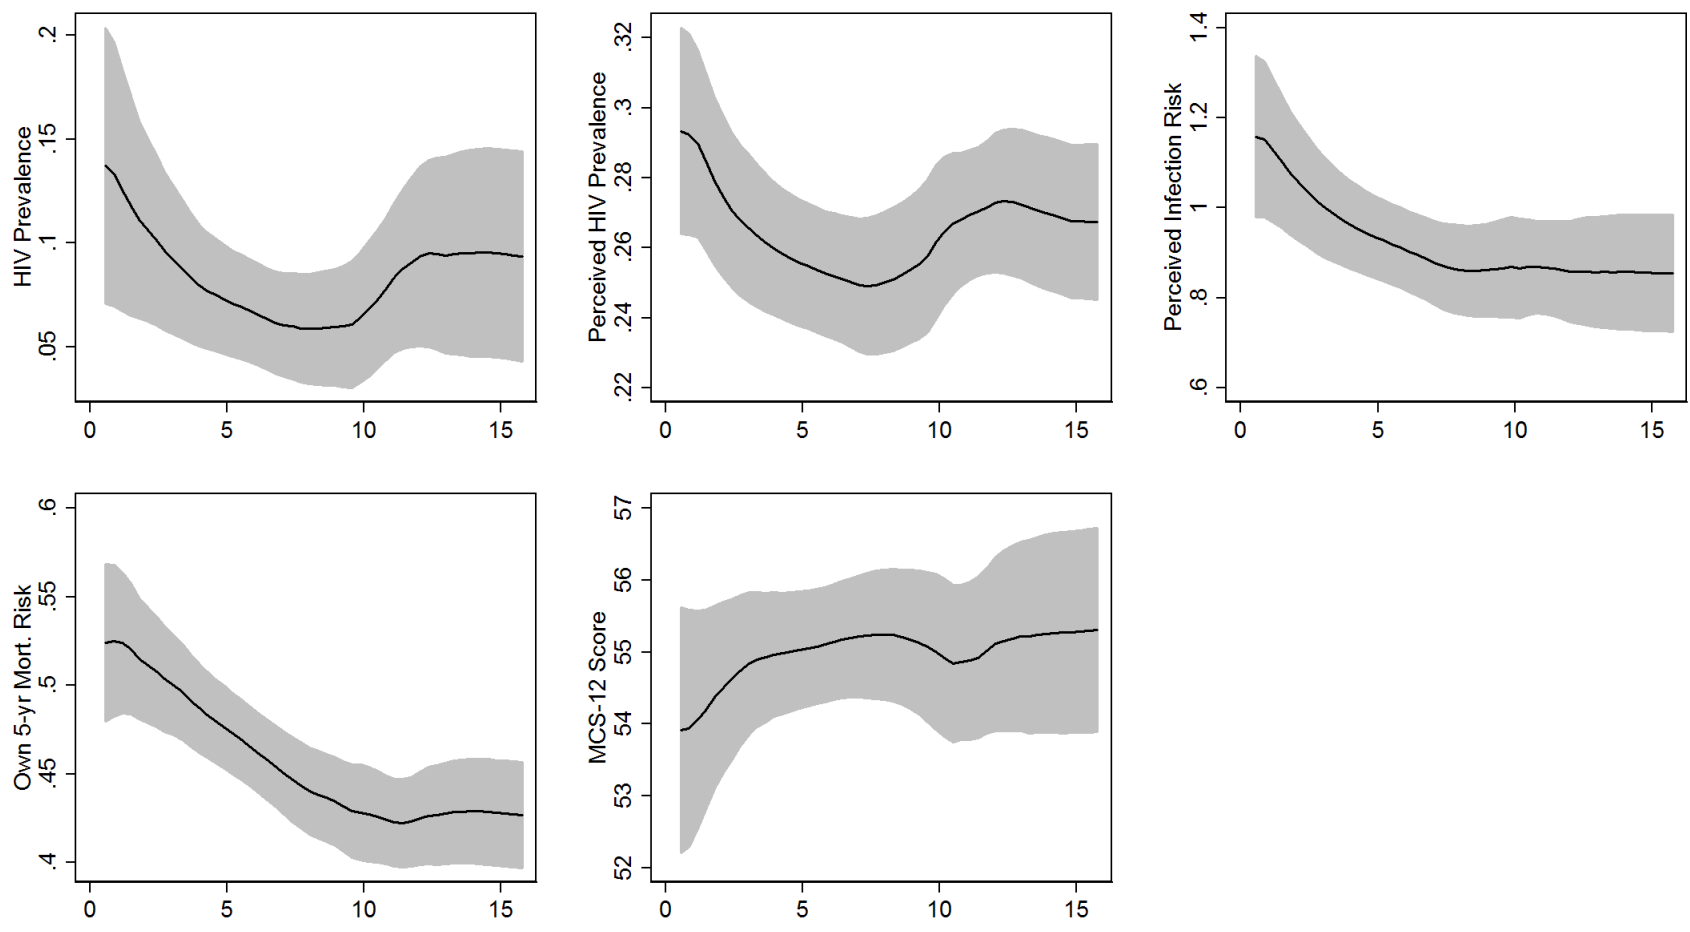

Figure 1: HIV Severity and the Distance to a Trading Center in the Balaka Region

1  
2  
3  
4  
5  
6  
7  
8  
9  
10  
11  
12  
13  
14  
15  
16  
17  
18  
19  
20  
21  
22  
23  
24  
25  
26  
27  
28  
29  
30  
31  
32  
33  
34  
35  
36  
37  
38  
39  
40  
41  
42  
43  
44  
45  
46  
47  
48  
49

A7

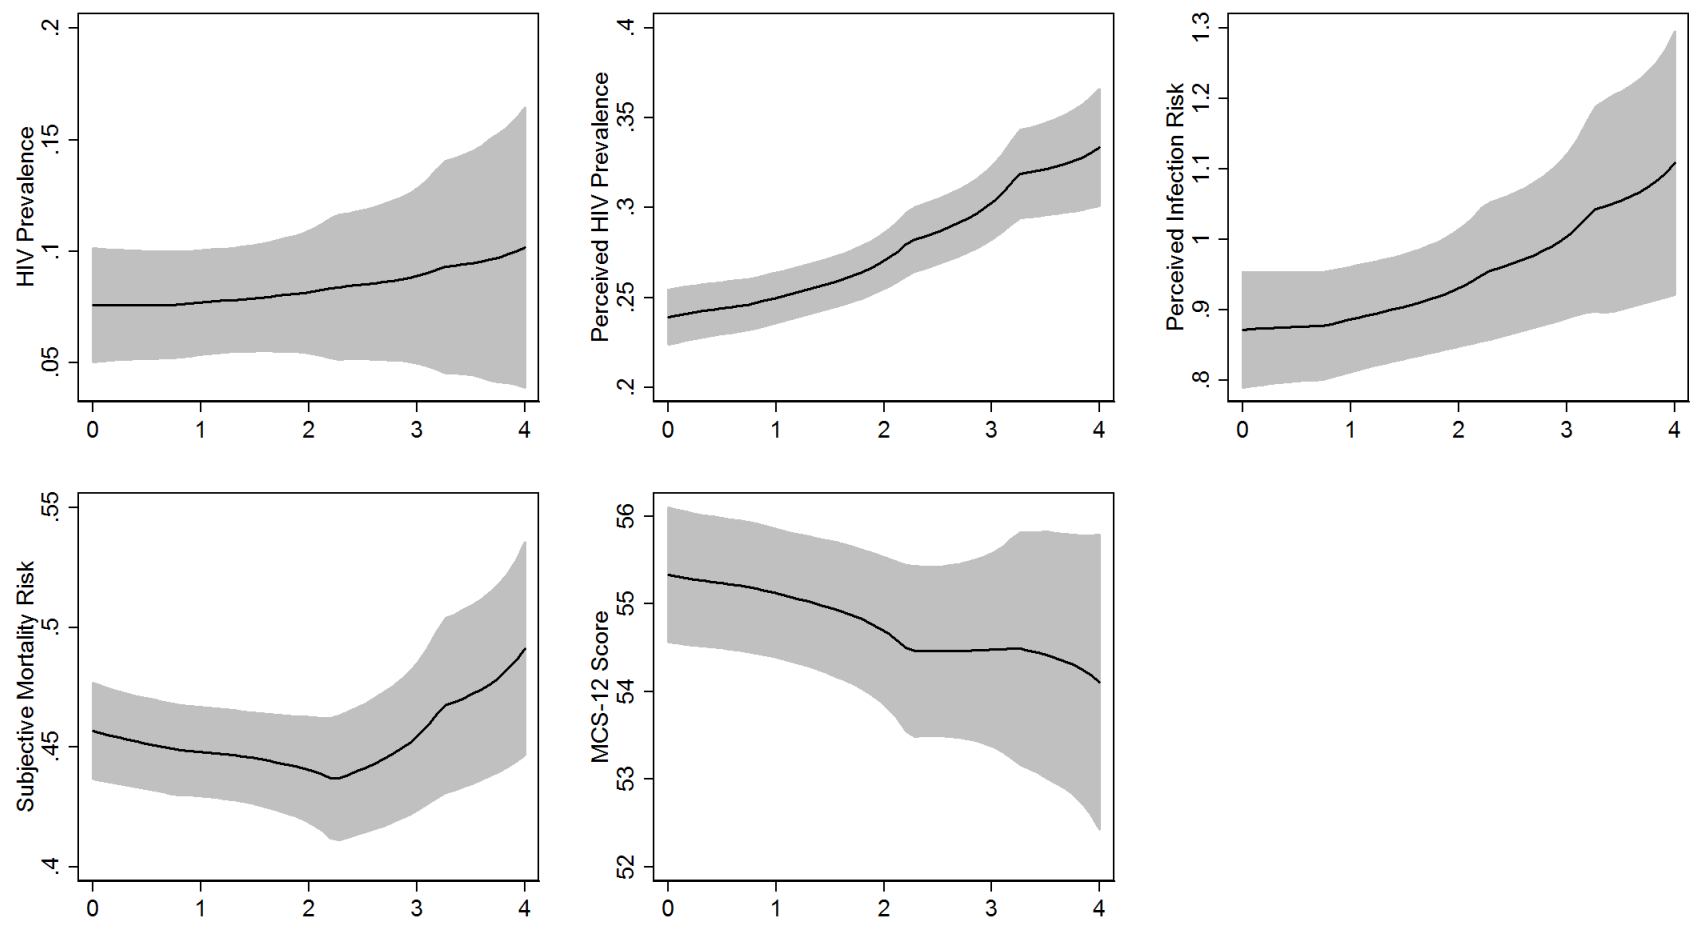

Figure 2: HIV Severity and Respondent-Observed AIDS Deaths in Balaka District, 2006

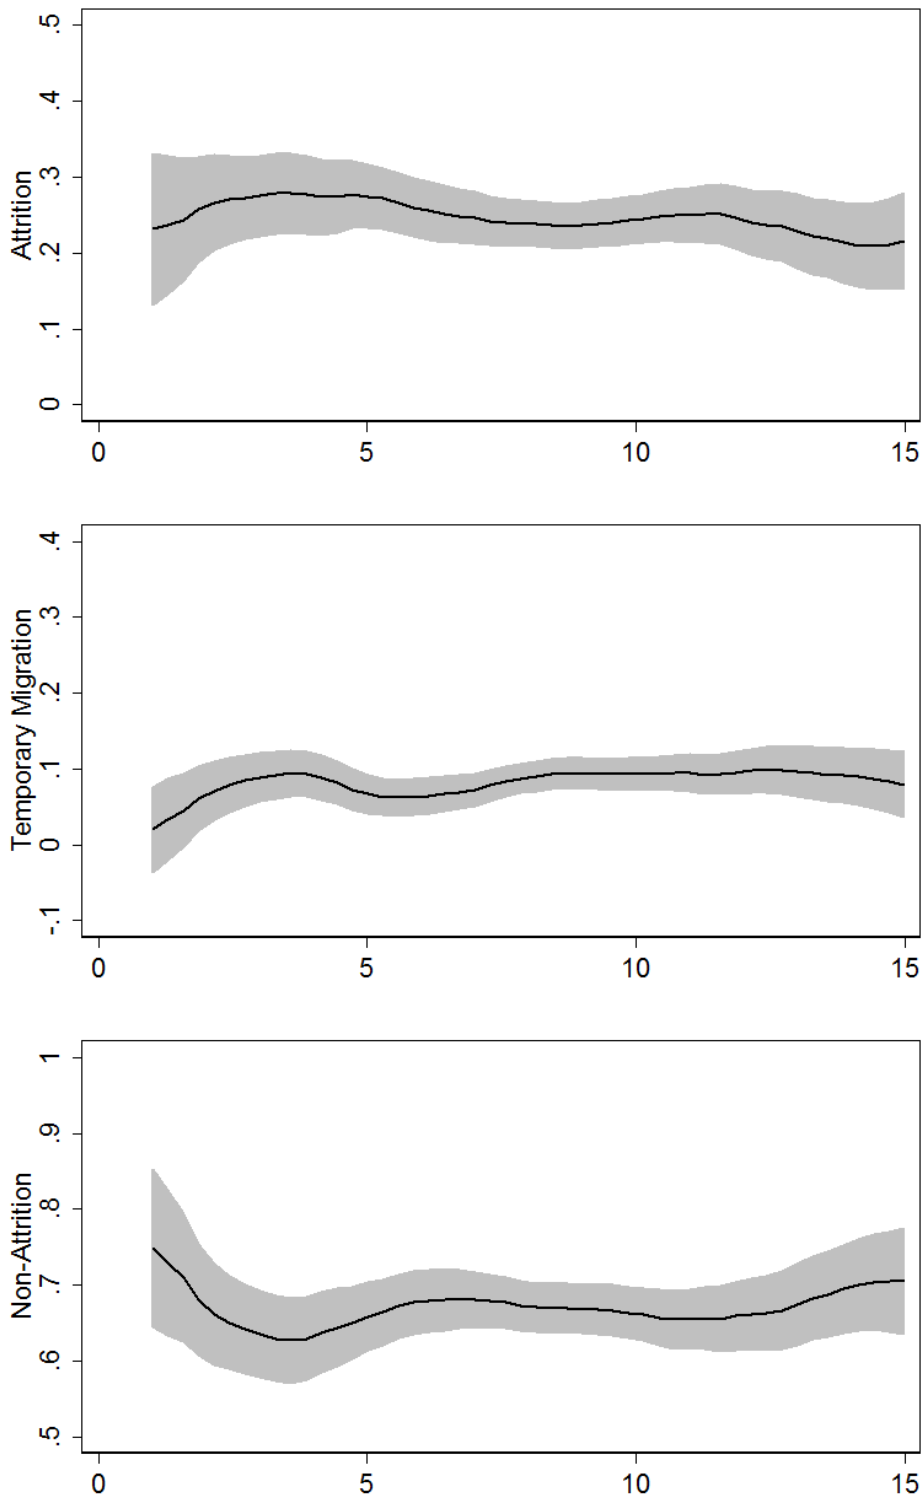

Figure 3: Local Linear Regressions of Attrition Status on the Distance to ART



Table A1: Clinic Characteristics

| ART Arrival:                     | Through<br>May 2006<br>(1) | June 2006 -<br>May 2008<br>(2) | June 2008-<br>Sept. 2010<br>(3) |
|----------------------------------|----------------------------|--------------------------------|---------------------------------|
| Catchment Population (thousands) | 54***                      | 32                             | 19***                           |
| Number of Beds                   | 182***                     | 20                             | 12**                            |
| Electricity                      | 0.97***                    | 0.53                           | 0.42                            |
| Flush Toilet                     | 0.98***                    | 0.45                           | 0.31**                          |
| HIV Testing                      | 0.95                       | 0.95                           | 0.82**                          |
| Outpatient                       | 0.98                       | 1.00                           | 0.96                            |
| Inpatient Maternity              | 0.95                       | 1.00                           | 0.74***                         |
| Inpatient General                | 0.86***                    | 0.26                           | 0.15**                          |
| Antenatal Clinic                 | 0.98                       | 1.00                           | 0.81***                         |
| STI Clinic                       | 0.83***                    | 0.46                           | 0.34*                           |
| TB Clinic                        | 0.92*                      | 0.82                           | 0.70**                          |
| Laboratory                       | 0.91***                    | 0.44                           | 0.17***                         |
| Observations                     | 65                         | 57                             | 483                             |

Note: Stars in Columns 1 and 3 indicate significant differences with Column 2. \*  $p < 0.1$ , \*\*  $p < 0.05$ , \*\*\*  $p < 0.01$ .

Table A2: 2006 Respondent Characteristics by Attrition Status

|                                                | Non-attriters | Temporary<br>Migrants | Attriters |
|------------------------------------------------|---------------|-----------------------|-----------|
|                                                | (1)           | (2)                   | (3)       |
| <u>Panel A: Mental Health and Labor Supply</u> |               |                       |           |
| MCS-12                                         | 55.6          | 55.9                  | 55.4      |
| Depressed in last four weeks                   | 0.30          | 0.30                  | 0.30      |
| Energetic in last four weeks                   | 0.59          | 0.58                  | 0.54      |
| Calm in last four weeks                        | 0.56          | 0.55                  | 0.55      |
| MH limits on activity                          | 0.10          | 0.08                  | 0.12      |
| MH limits on accomplishments                   | 0.10          | 0.09                  | 0.12      |
| Subjective well-being                          | 0.67          | 0.65                  | 0.73**    |
| Total productive time (hrs per day)            | 8.50          | 7.79**                | 7.66***   |
| Cultivation time (hrs per day)                 | 2.84          | 2.21**                | 2.25***   |
| Home production time (hrs per day)             | 4.20          | 3.94                  | 3.60***   |
| Other production time (hrs per day)            | 1.49          | 1.63                  | 1.80**    |
| <u>Panel B: Mortality Risk</u>                 |               |                       |           |
| Five-year subjective mortality risk            | 0.39          | 0.38                  | 0.41*     |
| Infection risk A (Likert scale)                | 0.70          | 0.87**                | 0.77      |
| Infection risk B                               | 0.22          | 0.20                  | 0.22      |
| Five-year subjective HIV+ mortality risk       | 0.69          | 0.66                  | 0.70      |
| HIV-positive                                   | 0.04          | 0.07**                | 0.09***   |
| Perceived HIV prevalence                       | 0.27          | 0.28                  | 0.30**    |
| Worried about HIV                              | 0.40          | 0.46                  | 0.39      |
| <u>Panel C: Demographic Characteristics</u>    |               |                       |           |
| Education                                      | 5.1           | 6.0***                | 5.3       |
| Age                                            | 36.9          | 31.8***               | 34.0***   |
| Married                                        | 0.84          | 0.66***               | 0.73***   |
| Household size                                 | 5.5           | 5.1*                  | 5.2**     |
| Metal roof                                     | 0.15          | 0.15                  | 0.21**    |
| Monetary wealth (2006 USD)                     | 25.5          | 28.1                  | 47.7**    |
| Sample size                                    | 1260          | 154                   | 463       |

Note: Attrition is defined with respect to the 2006 survey. Non-attriters are present in 2006, 2008 and 2010. Temporary migrants are present in 2006 and 2010 but absent in 2008. Attriters are present in 2006 but absent in 2010. Stars in Columns 2 and 3 indicate significant differences with Column 1. \*  $p < 0.1$ , \*\*  $p < 0.05$ , \*\*\*  $p < 0.01$ .

1  
2  
3  
4  
5  
6  
7  
8  
9  
10  
11  
12  
13  
14  
15  
16  
17  
18  
19  
20  
21  
22  
23  
24  
25  
26  
27  
28  
29  
30  
31  
32  
33  
34  
35  
36  
37  
38  
39  
40  
41  
42  
43  
44  
45  
46  
47  
48  
49

Table A3: Key Estimates for Non-Attriters

| Dependent variable:                    | Work Time                   |                             | Own Mort. Risk                  |                                 | MCS-12                      |                             |
|----------------------------------------|-----------------------------|-----------------------------|---------------------------------|---------------------------------|-----------------------------|-----------------------------|
|                                        | (1)                         | (2)                         | (3)                             | (4)                             | (5)                         | (6)                         |
| <u>Panel A: Full Sample:</u>           |                             |                             |                                 |                                 |                             |                             |
| 2008 · ART proximity                   | -                           | -                           | -0.19**<br>(0.079)<br>[-0.021]  | -0.19**<br>(0.085)<br>[-0.024]  | 6.39**<br>(2.71)<br>[0.77]  | 6.87**<br>(2.76)<br>[0.86]  |
| 2010 · ART proximity                   | 5.18**<br>(2.04)<br>[0.65]  | 5.40***<br>(1.82)<br>[0.67] | -0.28***<br>(0.083)<br>[-0.033] | -0.27***<br>(0.082)<br>[-0.034] | 7.18***<br>(2.07)<br>[0.84] | 7.75***<br>(2.54)<br>[0.97] |
| Proportional selection $\delta$ (2008) | -                           | -                           | -                               | 1.72                            | -                           | -0.70                       |
| Proportional selection $\delta$ (2010) | -                           | -1.95                       | -                               | 1.70                            | -                           | -0.65                       |
| Dependent variable mean                | 7.46                        | 7.46                        | 0.41                            | 0.41                            | 54.3                        | 54.3                        |
| Observations                           | 3711                        | 3711                        | 3828                            | 3828                            | 3840                        | 3840                        |
| <u>Panel B: HIV-/NCT Sample:</u>       |                             |                             |                                 |                                 |                             |                             |
| 2008 · ART proximity                   | -                           | -                           | -0.16<br>(0.096)<br>[-0.016]    | -0.12<br>(0.098)<br>[-0.015]    | 5.95**<br>(2.99)<br>[0.70]  | 5.91*<br>(3.10)<br>[0.74]   |
| 2010 · ART proximity                   | 5.74***<br>(2.09)<br>[0.72] | 5.25***<br>(1.90)<br>[0.66] | -0.25**<br>(0.11)<br>[-0.030]   | -0.21*<br>(0.11)<br>[-0.026]    | 6.67***<br>(2.29)<br>[0.78] | 6.72***<br>(2.49)<br>[0.84] |
| Proportional selection $\delta$ (2008) | -                           | -                           | -                               | 0.46                            | -                           | 5.33                        |
| Proportional selection $\delta$ (2010) | -                           | 1.04                        | -                               | 0.72                            | -                           | -3.46                       |
| Dependent variable mean                | 7.47                        | 7.47                        | 0.40                            | 0.40                            | 54.9                        | 54.9                        |
| Observations                           | 2769                        | 2769                        | 2865                            | 2865                            | 2866                        | 2866                        |
| Demo. and economic controls            | -                           | Yes                         | -                               | Yes                             | -                           | Yes                         |

Note: Village-clustered standard errors appear in parentheses. Impacts of a change from 8 kilometers to 4 kilometers ( $0.125 \cdot \hat{\beta}$ ) appear in brackets. Regressions only include respondents who are present in 2006, 2008, and 2010. \*  $p < 0.1$ , \*\*  $p < 0.05$ , \*\*\*  $p < 0.01$ .

Table A4: Estimates for HIV-Positive and Caretaker Respondents

|                                  | Work Time                | Own<br>Mort. Risk              | MCS-12                     |
|----------------------------------|--------------------------|--------------------------------|----------------------------|
|                                  | (1)                      | (2)                            | (3)                        |
| <u>Panel A: HIV+ Sample</u>      |                          |                                |                            |
| 2008 · ART proximity             | -                        | 0.053<br>(0.55)<br>[0.007]     | 0.44<br>(14.4)<br>[0.055]  |
| 2010 · ART proximity             | 6.90<br>(7.96)<br>[0.86] | -0.13<br>(0.37)<br>[-0.017]    | -1.23<br>(11.1)<br>[-0.15] |
| Dependent variable mean          | 7.51                     | 0.48                           | 52.0                       |
| Observations                     | 348                      | 265                            | 265                        |
| <u>Panel B: Caretaker Sample</u> |                          |                                |                            |
| 2008 · ART proximity             | -                        | -0.44***<br>(0.16)<br>[-0.056] | 9.01*<br>(5.39)<br>[1.13]  |
| 2010 · ART proximity             | 3.46<br>(5.36)<br>[0.43] | -0.37**<br>(0.14)<br>[-0.046]  | 10.8**<br>(4.89)<br>[1.35] |
| Dependent variable mean          | 7.52                     | 0.45                           | 52.3                       |
| Observations                     | 1110                     | 1033                           | 1033                       |

Note: Village-clustered standard errors appear in parentheses. Impacts of a change from 8 kilometers to 4 kilometers ( $0.125 \cdot \hat{\beta}$ ) appear in brackets. A person is classified as HIV-positive or a caretaker if he or she satisfies these conditions in any survey round. All regressions include individual and region · year fixed effects.  $p < 0.1$ , \*\*  $p < 0.05$ , \*\*\*  $p < 0.01$ .

Table A5: Estimates that Address Mean Reversion

| Dependent variable:  | Own            |                  |                   |
|----------------------|----------------|------------------|-------------------|
|                      | Work Time      | Mort. Risk       | MCS-12            |
|                      | (1)            | (2)              | (3)               |
| 2008 · ART proximity | -              | 0.053<br>(0.060) | 2.66<br>(2.78)    |
| 2010 · ART proximity | 2.43<br>(1.98) | -0.13<br>(0.084) | 5.68***<br>(1.89) |
| Observations         | 2981           | 3280             | 3280              |

Note: Village-clustered standard errors appear in parentheses. Regressions control for the 2006 value of the dependent variable · 2008 and 2010, as well as the 2004 value of the dependent variable · 2008 and 2010 in Column 2. All regressions include individual and region · year fixed effects. \*  $p < 0.1$ , \*\*  $p < 0.05$ , \*\*\*  $p < 0.01$ .

1  
2  
3  
4  
5  
6  
7  
8  
9  
10  
11  
12  
13  
14  
15  
16  
17  
18  
19  
20  
21  
22  
23  
24  
25  
26  
27  
28  
29  
30  
31  
32  
33  
34  
35  
36  
37  
38  
39  
40  
41  
42  
43  
44  
45  
46  
47  
48  
49

Table A6: Estimates Using Distance Polynomials

|                                  | Work Time         |                   |                     | Mortality Risk     |                      |                        | MCS-12             |                     |                   |
|----------------------------------|-------------------|-------------------|---------------------|--------------------|----------------------|------------------------|--------------------|---------------------|-------------------|
|                                  | (1)               | (2)               | (3)                 | (4)                | (5)                  | (6)                    | (7)                | (8)                 | (9)               |
| 2010 · ART distance              | -0.053<br>(0.072) | -0.61**<br>(0.29) | -1.58***<br>(0.51)  | 0.0056*<br>(0.003) | 0.027**<br>(0.011)   | 0.060***<br>(0.019)    | -0.19**<br>(0.089) | -1.30***<br>(0.28)  | -1.25*<br>(0.65)  |
| 2010 · ART distance <sup>2</sup> | -                 | 0.029*<br>(0.016) | 0.15***<br>(0.052)  | -                  | -0.0012**<br>(0.001) | -0.0051**<br>(0.002)   | -                  | 0.060***<br>(0.015) | 0.054<br>(0.073)  |
| 2010 · ART distance <sup>3</sup> | -                 | -                 | -0.004**<br>(0.002) | -                  | -                    | 0.00014**<br>(0.00066) | -                  | -                   | 0.0002<br>(0.003) |
| P-value: all terms               | 0.46              | 0.06              | 0.02                | 0.10               | 0.05                 | 0.01                   | 0.03               | 0.00                | 0.00              |
| Observations                     | 5380              | 5380              | 5380                | 4875               | 4875                 | 4875                   | 4875               | 4875                | 4875              |

Note: clustered standard errors appear in parentheses.  $p < 0.1$ , \*\*  $p < 0.05$ , \*\*\*  $p < 0.01$ .

Table A7: Alternative Distance Parameterizations

| Dependent variable:                     | Work Time          | Own<br>Mort. Risk    | MCS-12             |
|-----------------------------------------|--------------------|----------------------|--------------------|
|                                         | (1)                | (2)                  | (3)                |
| <u>Panel A: Piecewise Linear Spline</u> |                    |                      |                    |
| 2008 · [D ≤ 8] · ART distance           | -                  | 0.019**<br>(0.0089)  | -0.25<br>(0.24)    |
| 2008 · [D > 8] · ART distance           | -                  | -0.016**<br>(0.0067) | 0.20<br>(0.21)     |
| 2010 · [D ≤ 8] · ART distance           | -0.46***<br>(0.17) | 0.022***<br>(0.0080) | -0.67***<br>(0.24) |
| 2010 · [D > 8] · ART distance           | -0.037<br>(0.12)   | -0.0079<br>(0.0049)  | 0.24<br>(0.25)     |
| <u>Panel B: Discrete Distance Bins</u>  |                    |                      |                    |
| 2008 · [D ≤ 4]                          | -                  | -0.079**<br>(0.031)  | 2.13**<br>(0.98)   |
| 2008 · [4 < D ≤ 8]                      | -                  | 0.012<br>(0.027)     | 1.93**<br>(0.84)   |
| 2010 · [D ≤ 4]                          | 1.10<br>(0.68)     | -0.074<br>(0.045)    | 3.12***<br>(0.92)  |
| 2010 · [4 < D ≤ 8]                      | 0.22<br>(0.47)     | -0.022<br>(0.022)    | 1.22<br>(0.90)     |
| Observations                            | 4998               | 4542                 | 4542               |

Note: Village-clustered standard errors appear in parentheses. [D < 4] is an indicator for distances to ART under 4 kilometers. [D < 8] is an indicator for distances to ART under 8 kilometers. [4 < D ≤ 8] is an indicator for distances to ART between 4 and 8 kilometers. \*  $p < 0.1$ , \*\*  $p < 0.05$ , \*\*\*  $p < 0.01$ .
